# Supplementary material
Source: Springer Nature journal article supplement (https://www.springermedizin.de/resource/supplementary/12875_2008_317_MOESM3_ESM.pdf/9436736)
Supplement: MOESM3 [file 9436736]

### ***Patient barriers***

- Entrenched views of symptom causation
- Learned behaviours
- Secondary gain from unexplained symptoms

### ***Doctor barriers***

- Variations in skills in managing patients with MUS
- Prior expectations of patients
- Concern about dependence
- Emotional state during consultation

### ***Consultation barriers***

- Patients choosing lack of continuity
- Communicating difficult experiences
- Doctors' responses to patients with MUS

### ***Diagnostic barriers***

- Complex presentations
- Nebulous definitions of MUS

### ***Barriers in the healthcare context***

- Time
- Quality Outcomes Framework
- Impact of secondary care
- Medico-legal framework of primary care
